# Supplementary material for: Kinetic analysis and optimization of sonoreactor process for production of humic and fulvic acids from various coal feedstocks
Source: Royal Society of Chemistry journal article supplement (doi:10.1039/d5su00752f), 2025-11-17
Supplement: d5su00752f1.pdf [file d5su00752f1.pdf]

# Kinetic Analysis and Optimization of Sonoreactor Process for Production of Humic and Fulvic Acids from Various Coal Feedstocks

Redhwan Al-Akbari,<sup>1</sup> Abdallah D. Manasrah,<sup>2</sup> Nashaat N. Nassar<sup>1,\*</sup>

<sup>1</sup> Department of Chemical and Petroleum Engineering, University of Calgary, 2500 University Drive Northwest, Calgary, Alberta T2N 1N4, Canada

<sup>2</sup> Carbon OxyTech Inc. Calgary, Alberta, Canada, T2L 1Y8, Tel: 403-561-2264

\*Corresponding authors: Emails: [manasrah@carbonoxytech.com](mailto:manasrah@carbonoxytech.com)

[nassar@ucalgary.ca](mailto:nassar@ucalgary.ca)

## Supplementary Information

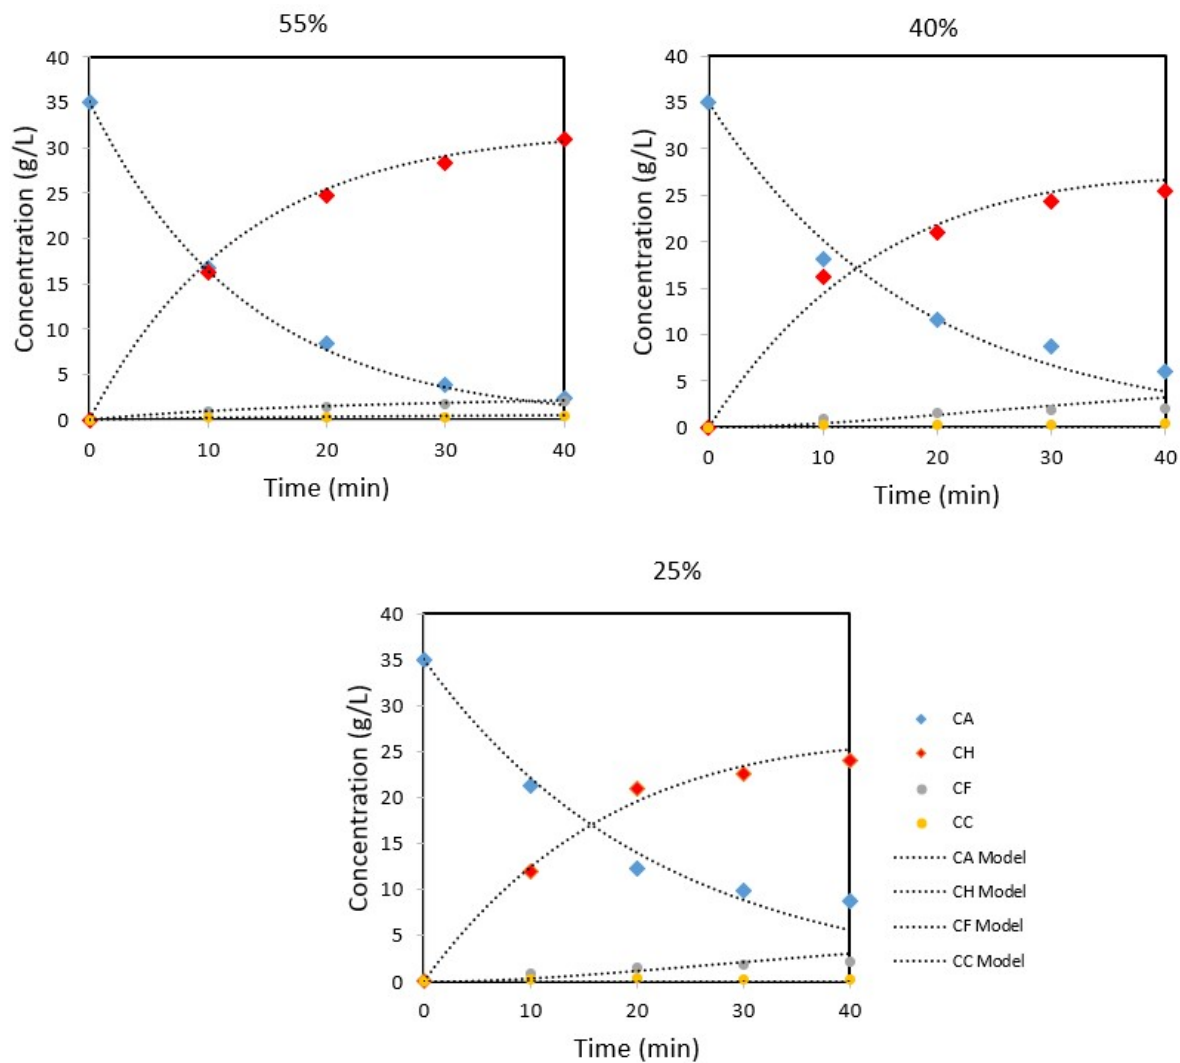

Figure S 1: Concentration profiles showing concentration of peat (CA), concentration of humic acids (CH) concentration of fulvic acid (CF) and concentration of CO2 (CC).

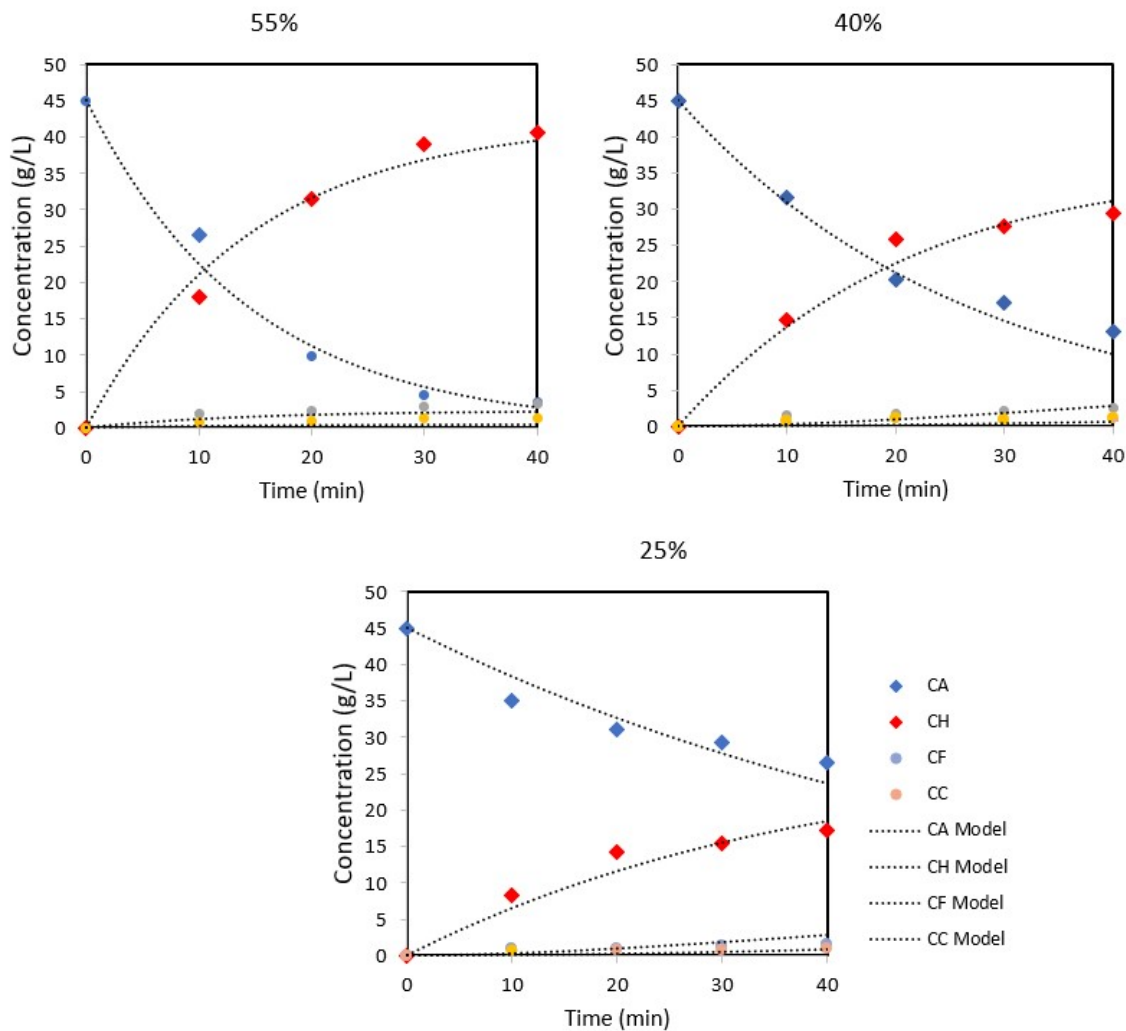

Figure S 2: Concentration profiles showing concentration of humalite (CA), concentration of humic acids (CH) concentration of fulvic acid (CF) and concentration of CO<sub>2</sub> (CC).

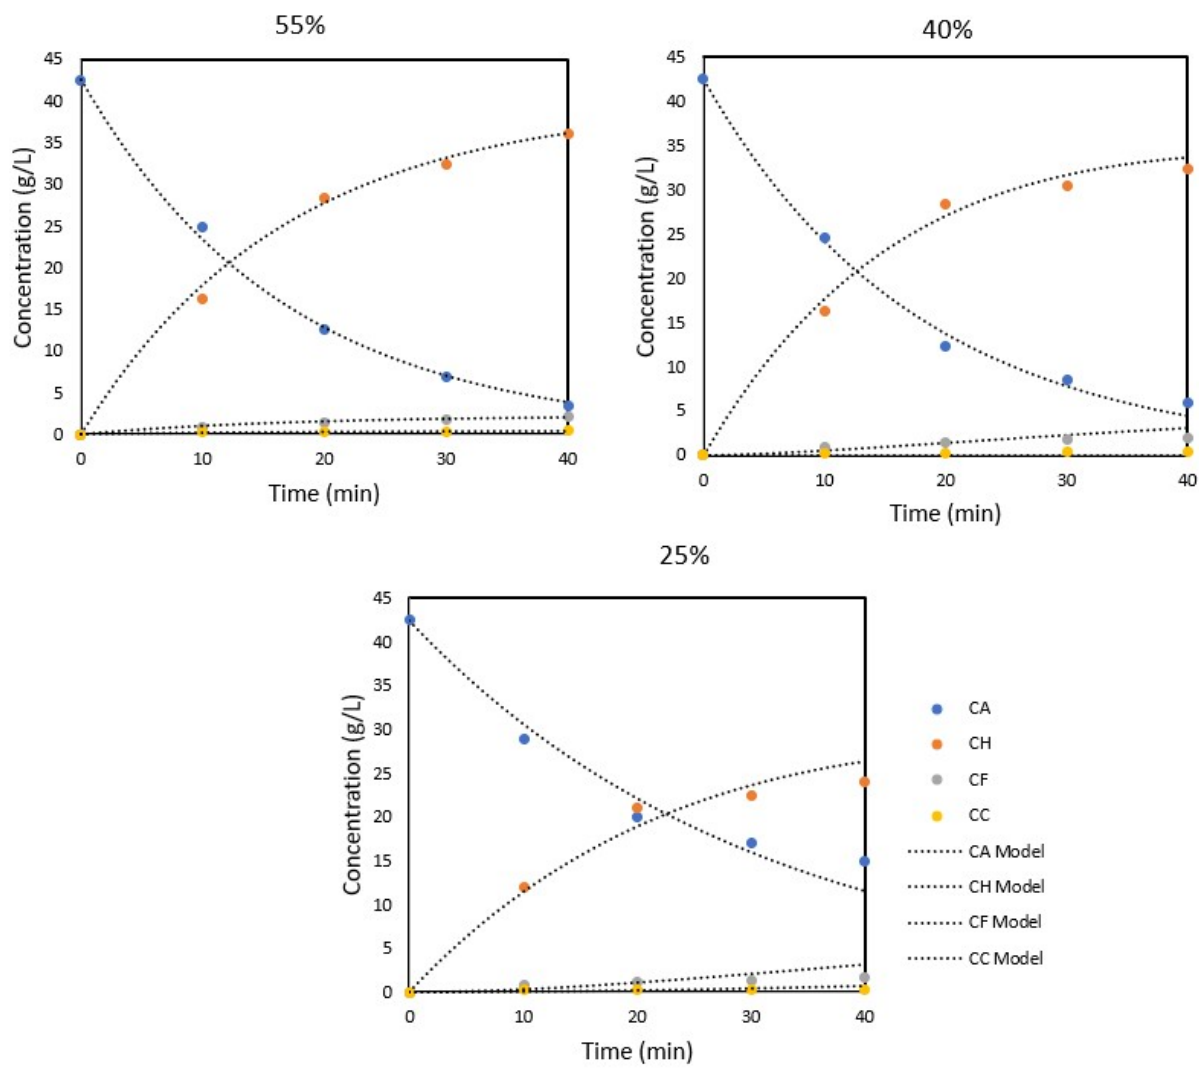

Figure S 3: Concentration profiles showing concentration of subbituminous (CA), concentration of humic acids (CH) concentration of fulvic acid (CF) and concentration of CO<sub>2</sub> (CC).
